# Supplementary material
Source: MDPI journal article supplement (https://www.mdpi.com/1424-8247/17/1/40)
Supplement: s1 [file s1]

## Supplementary Materials

**Table S1.** Chemical composition of Sardinian *Juniper oxycedrus* L. ssp. Macrocarpa essential oil. The table includes the chemical composition of essential oil from aerial parts of Sardinian *Juniper oxycedrus* L. ssp. Macrocarpa based on GC/MS analysis. Column was a “no-polar column ZB-5”. Data represent the mean of three replicates  $\pm$  SD.

| Rt    | RI apol<br>Lett | RI apol<br>Sper | Constituents               | %                | I.D. <sup>(a)</sup> |
|-------|-----------------|-----------------|----------------------------|------------------|---------------------|
| 10.38 | 700             | 704             | heptane                    | 0.05 $\pm$ 0.01  | RI, MS              |
| 21.50 | 920             | 920             | $\beta$ -thujene           | 0.10 $\pm$ 0.02  | Std                 |
| 22.08 | 937             | 939             | $\alpha$ -pinene           | 56.63 $\pm$ 0.24 | Std                 |
| 22.89 | 945             | 953             | $\alpha$ -fenchene         | 0.05 $\pm$ 0.01  | Std                 |
| 23.01 | 956             | 955             | camphene                   | 1.50 $\pm$ 0.02  | Std                 |
| 23.59 | 970             | 974             | benzaldehyde               | 0.04 $\pm$ 0.01  | RI, MS              |
| 24.14 | 975             | 977             | $\alpha$ -sabinene         | 0.33 $\pm$ 0.03  | Std                 |
| 24.59 | 979             | 981             | $\beta$ -pinene            | 13.42 $\pm$ 0.09 | Std                 |
| 24.90 | 991             | 992             | $\beta$ -myrcene           | 0.73 $\pm$ 0.04  | Std                 |
| 25.94 | 1004            | 1003            | pseudolimonene             | 0.03 $\pm$ 0.01  | RI, MS              |
| 26.06 | 1003            | 1005            | $\alpha$ -phellandrene     | 0.04 $\pm$ 0.01  | Std                 |
| 26.22 | 1008            | 1011            | $\gamma$ -3-carene         | 0.66 $\pm$ 0.02  | Std                 |
| 26.64 | 1017            | 1015            | $\alpha$ -terpinene        | 0.30 $\pm$ 0.02  | Std                 |
| 27.06 | 1025            | 1026            | p-cymene                   | 0.51 $\pm$ 0.03  | Std                 |
| 27.36 | 1029            | 1027            | limonene                   | 14.66 $\pm$ 0.11 | Std                 |
| 27.46 | 1026            | 1030            | benzyl alcohol             | 3.41 $\pm$ 0.05  | RI, MS              |
| 27.59 | 1026            | 1031            | 1,8-cineole                | 1.37 $\pm$ 0.03  | Std                 |
| 28.88 | 1060            | 1064            | $\gamma$ -terpinene        | 0.16 $\pm$ 0.02  | Std                 |
| 30.39 | 1088            | 1087            | $\gamma$ -terpinolene      | 0.14 $\pm$ 0.01  | Std                 |
| 32.46 | 1129            | 1128            | <i>cis</i> -allo-ocimene   | 3.00 $\pm$ 0.07  | RI, MS              |
| 33.16 | 1131            | 1131            | <i>trans</i> -allo-ocimene | 0.25 $\pm$ 0.03  | RI, MS              |
| 33.59 | 1137            | 1141            | <i>trans</i> -sabinol      | 0.06 $\pm$ 0.01  | RI, MS              |
| 35.17 | 1169            | 1166            | endo-borneol               | 0.03 $\pm$ 0.01  | RI, MS              |

|       |      |      |                            |           |        |
|-------|------|------|----------------------------|-----------|--------|
| 35.50 | 1177 | 1180 | terpinen-4-ol              | 0.13±0.02 | Std    |
| 35.67 | 1179 | 1183 | p-cymen-8-ol               | 0.02±0.01 | RI, MS |
| 36.13 | 1186 | 1180 | $\alpha$ -terpineol        | 0.08±0.02 | Std    |
| 39.99 | 1189 | 1287 | bornyl acetate             | 0.08±0.01 | RI, MS |
| 42.39 | 1350 | 1352 | $\alpha$ -cubebene         | 0.03±0.01 | Std    |
| 42.73 | 1350 | 1353 | $\alpha$ -longipinene      | 0.02±0.01 | RI, MS |
| 45.06 | 1419 | 1419 | $\beta$ -caryophyllene     | 0.40±0.08 | Std    |
| 46.17 | 1452 | 1454 | humulene                   | 0.07±0.02 | Std    |
| 46.58 | 1480 | 1480 | $\gamma$ -muurolene        | 0.03±0.01 | RI, MS |
| 46.89 | 1485 | 1482 | germacrene D               | 0.05±0.01 | Std    |
| 47.78 | 1521 | 1523 | $\delta$ -cadinene         | 0.10±0.02 | Std    |
| 47.93 | 1529 | 1530 | calamenene                 | 0.02±0.01 | RI, MS |
| 49.81 | 1582 | 1583 | caryophyllene oxide        | 0.07±0.02 | Std    |
|       |      |      | Total                      | 99.72     |        |
|       |      |      | Hydrocarbon monoterpene    | 72.5      |        |
|       |      |      | Oxygenated monoterpene     | 1.28      |        |
|       |      |      | Hydrocarbon sesquiterpenes | 23        |        |
|       |      |      | Oxygenated sesquiterpenes  | 2         |        |
|       |      |      | Diterpenes                 | 0.54      |        |
|       |      |      | Others                     | 0.4       |        |

- (a) Identification methods: RI (Retention Index): Comparative analysis with retention indexes reported in the literature; Std (Standard): Evaluation based on comparison of the retention time and mass spectrum with available authentic standards; MS (Mass Spectrum): Comparison with computer mass libraries such as Adams, Nist 11 and by interpretation of the mass spectra fragmentations.

**Table S2.** Universal and species specific primers used in *C. albicans* molecular identification.

| Species                           | Primer name | Sequences            |
|-----------------------------------|-------------|----------------------|
| <i>Clinically relevant Yeasts</i> | UNI 1       | GTCAAACCTTGGTCATTTA  |
|                                   | UNI 2       | TTCTTTTCCTCCGCTTATTG |
| <i>C. albicans</i>                | Calb        | AGCTGCCGCCAGAGGTCTAA |

**Table S3.** Primers used in PCR for bacterial molecular identification. The table shows all primers that used in the PCR reaction for *P. aeruginosa* and *S. aureus* molecular identification and the amplified gene for each genus and the length of the amplified fragment in bp

| Species              | Primer name | Sequences                                   |
|----------------------|-------------|---------------------------------------------|
| 16S rDNA             | 16S         | AGAGTTTGATCMTGGCTCAG<br>GYTACCTTGTTACGACTT  |
| <i>P. aeruginosa</i> | SSS         | GCCTCTACCAGTACCTGCTAC<br>GYTACCTTGTTACGACTT |
| <i>S. aureus</i>     | aur         | TCGCTTGCTATGATTGTGG<br>GCCAATGTTCTACCATAGC  |
